# Supplementary material for: Developed Hybrid Model for Propylene Polymerisation at Optimum Reaction Conditions
Source: PubMed Central journal article supplement (PMC6432575; doi:10.3390/polym8020047), 2016-02-10
Supplement: polymers-08-00047-s001.pdf [file polymers-08-00047-s001.pdf]

# Supplementary Materials: Developed Hybrid Model for Propylene Polymerisation at Optimum Reaction Conditions

Mohammad Jakir Hossain Khan, Mohd Azlan Hussain and Iqbal Mohammed Mujtaba

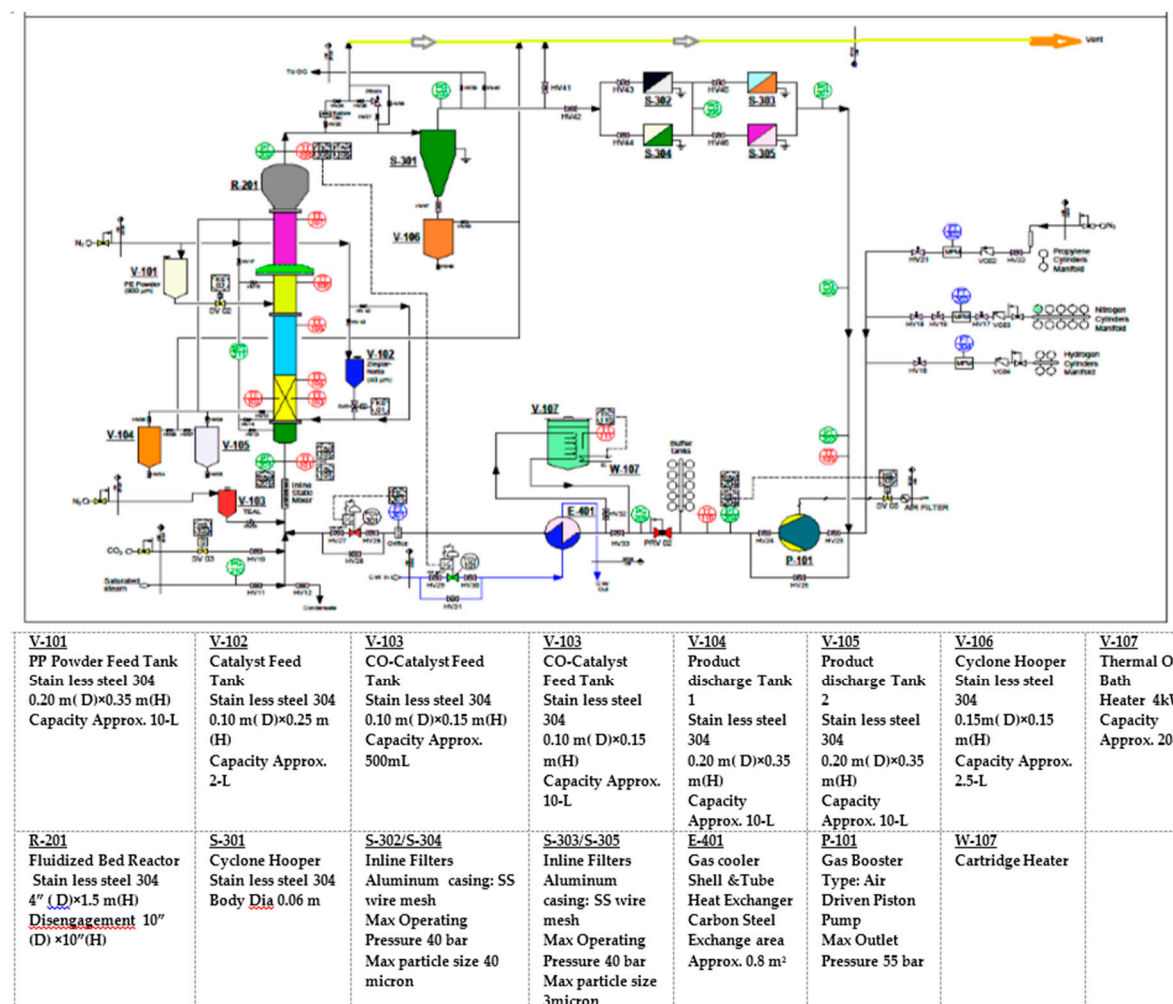

**Figure S1.** Globally unique pilot scale fluidised bed catalytic reactor schematic for propylene polymerization, designed and fabricated at Department of Chemical Engineering, University of Malaya, Malaysia.

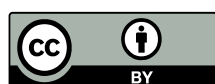

© 2016 by the authors; licensee MDPI, Basel, Switzerland. This article is an open access article distributed under the terms and conditions of the Creative Commons by Attribution (CC-BY) license (<http://creativecommons.org/licenses/by/4.0/>).
